# Supplementary material
Source: ML conference proceedings conference paper supplement (https://openaccess.thecvf.com/content/CVPR2023/html/Kang_Superclass_Learning_With_CVPR_2023_paper.html)
Supplement: Supplementary file 3 [file Kang_Superclass_Learning_With_CVPR_2023_supplemental.zip]

Archive with 67 entries (54 files):
- Supplementary Material/
- Supplementary Material/.DS_Store
- __MACOSX/Supplementary Material/._.DS_Store
- Supplementary Material/Code/
- Supplementary Material/Supplementary Material.pdf
- __MACOSX/Supplementary Material/._Supplementary Material.pdf
- Supplementary Material/Code/ptgenerate/
- Supplementary Material/Code/.DS_Store
- __MACOSX/Supplementary Material/Code/._.DS_Store
- Supplementary Material/Code/iWildCam.py
- Supplementary Material/Code/dataprocessor/
- Supplementary Material/Code/FMoW.py
- Supplementary Material/Code/hyperparameters.py
- Supplementary Material/Code/__pycache__/
- Supplementary Material/Code/README.md
- Supplementary Material/Code/utils.py
- Supplementary Material/Code/model/
- Supplementary Material/Code/train.py
- Supplementary Material/Code/tensorboardreader.py
- Supplementary Material/Code/main_wilds.py
- Supplementary Material/Code/main.py
- Supplementary Material/Code/backup/
- Supplementary Material/Code/data/
- Supplementary Material/Code/runs/
- Supplementary Material/Code/ptgenerate/.DS_Store
- Supplementary Material/Code/ptgenerate/CIFAR100-4.csv
- Supplementary Material/Code/ptgenerate/cifar100.py
- Supplementary Material/Code/dataprocessor/__pycache__/
- Supplementary Material/Code/dataprocessor/datacomposer.py
- Supplementary Material/Code/dataprocessor/datareader.py
- Supplementary Material/Code/__pycache__/iWildCam.cpython-38.pyc
- Supplementary Material/Code/__pycache__/FMoW.cpython-38.pyc
- Supplementary Material/Code/__pycache__/train.cpython-38.pyc
- Supplementary Material/Code/__pycache__/utils.cpython-38.pyc
- Supplementary Material/Code/__pycache__/hyperparameters.cpython-38.pyc
- Supplementary Material/Code/model/TC.py
- Supplementary Material/Code/model/TC2.py
- Supplementary Material/Code/model/contrastive.py
- Supplementary Material/Code/model/__pycache__/
- Supplementary Material/Code/model/CNN.py
- Supplementary Material/Code/model/TargetLoss.py
- Supplementary Material/Code/model/target.py
- Supplementary Material/Code/model/resnet50.py
- Supplementary Material/Code/model/resnetxx.py
- Supplementary Material/Code/data/re_cifar100/
- Supplementary Material/Code/dataprocessor/__pycache__/datareader.cpython-37.pyc
- Supplementary Material/Code/dataprocessor/__pycache__/datareader.cpython-36.pyc
- Supplementary Material/Code/dataprocessor/__pycache__/datacomposer.cpython-38.pyc
- Supplementary Material/Code/dataprocessor/__pycache__/datacomposer.cpython-37.pyc
- Supplementary Material/Code/dataprocessor/__pycache__/datacomposer.cpython-36.pyc
- Supplementary Material/Code/dataprocessor/__pycache__/datareader.cpython-38.pyc
- Supplementary Material/Code/model/__pycache__/CNN.cpython-38.pyc
- Supplementary Material/Code/model/__pycache__/TC2.cpython-36.pyc
- Supplementary Material/Code/model/__pycache__/resnet50.cpython-38.pyc
- Supplementary Material/Code/model/__pycache__/TC2.cpython-37.pyc
- Supplementary Material/Code/model/__pycache__/contrastive.cpython-38.pyc
- Supplementary Material/Code/model/__pycache__/contrastive.cpython-36.pyc
- Supplementary Material/Code/model/__pycache__/contrastive.cpython-37.pyc
- Supplementary Material/Code/model/__pycache__/TargetLoss.cpython-38.pyc
- Supplementary Material/Code/model/__pycache__/CNN.cpython-36.pyc
- Supplementary Material/Code/model/__pycache__/CNN.cpython-37.pyc
- Supplementary Material/Code/model/__pycache__/target.cpython-38.pyc
- Supplementary Material/Code/model/__pycache__/resnet50.cpython-36.pyc
- Supplementary Material/Code/model/__pycache__/resnet50.cpython-37.pyc
- Supplementary Material/Code/model/__pycache__/resnetxx.cpython-38.pyc
- Supplementary Material/Code/model/__pycache__/TC2.cpython-38.pyc
- Supplementary Material/Code/data/re_cifar100/4_categories/
