# Supplementary material
Source: ML conference proceedings conference paper supplement (https://openaccess.thecvf.com/content/CVPR2023/html/Kang_Superclass_Learning_With_CVPR_2023_paper.html)
Supplement: Supplementary file 3 [file Kang_Superclass_Learning_With_CVPR_2023_supplemental.zip › Supplementary Material/Code/model/resnet50.py]

import torch
import torch.nn as nn
from torch.nn import functional as F


class ResNet50BasicBlock(nn.Module):
    def __init__(self, in_channel, outs, kernerl_size, stride, padding):
        super(ResNet50BasicBlock, self).__init__()
        self.conv1 = nn.Conv2d(in_channel, outs[0], kernel_size=kernerl_size[0], stride=stride[0], padding=padding[0])
        self.bn1 = nn.BatchNorm2d(outs[0])
        self.conv2 = nn.Conv2d(outs[0], outs[1], kernel_size=kernerl_size[1], stride=stride[0], padding=padding[1])
        self.bn2 = nn.BatchNorm2d(outs[1])
        self.conv3 = nn.Conv2d(outs[1], outs[2], kernel_size=kernerl_size[2], stride=stride[0], padding=padding[2])
        self.bn3 = nn.BatchNorm2d(outs[2])

    def forward(self, x):
        out = self.conv1(x)
        out = F.relu(self.bn1(out))

        out = self.conv2(out)
        out = F.relu(self.bn2(out))

        out = self.conv3(out)
        out = self.bn3(out)

        return F.relu(out + x)


class ResNet50DownBlock(nn.Module):
    def __init__(self, in_channel, outs, kernel_size, stride, padding):
        super(ResNet50DownBlock, self).__init__()
        # out1, out2, out3 = outs
        # print(outs)
        self.conv1 = nn.Conv2d(in_channel, outs[0], kernel_size=kernel_size[0], stride=stride[0], padding=padding[0])
        self.bn1 = nn.BatchNorm2d(outs[0])
        self.conv2 = nn.Conv2d(outs[0], outs[1], kernel_size=kernel_size[1], stride=stride[1], padding=padding[1])
        self.bn2 = nn.BatchNorm2d(outs[1])
        self.conv3 = nn.Conv2d(outs[1], outs[2], kernel_size=kernel_size[2], stride=stride[2], padding=padding[2])
        self.bn3 = nn.BatchNorm2d(outs[2])

        self.extra = nn.Sequential(
            nn.Conv2d(in_channel, outs[2], kernel_size=1, stride=stride[3], padding=0),
            nn.BatchNorm2d(outs[2])
        )

    def forward(self, x):
        x_shortcut = self.extra(x)
        out = self.conv1(x)
        out = self.bn1(out)
        out = F.relu(out)

        out = self.conv2(out)
        out = self.bn2(out)
        out = F.relu(out)

        out = self.conv3(out)
        out = self.bn3(out)
        return F.relu(x_shortcut + out)


class ResNet50(nn.Module):
    def __init__(self, category_num = 10):
        super(ResNet50, self).__init__()
        self.conv1 = nn.Conv2d(3, 64, kernel_size=7, stride=2, padding=3)
        self.maxpool = nn.MaxPool2d(kernel_size=3, stride=2, padding=1)

        self.layer1 = nn.Sequential(
            ResNet50DownBlock(64, outs=[64, 64, 256], kernel_size=[1, 3, 1], stride=[1, 1, 1, 1], padding=[0, 1, 0]),
            ResNet50BasicBlock(256, outs=[64, 64, 256], kernerl_size=[1, 3, 1], stride=[1, 1, 1, 1], padding=[0, 1, 0]),
            ResNet50BasicBlock(256, outs=[64, 64, 256], kernerl_size=[1, 3, 1], stride=[1, 1, 1, 1], padding=[0, 1, 0]),
        )

        self.layer2 = nn.Sequential(
            ResNet50DownBlock(256, outs=[128, 128, 512], kernel_size=[1, 3, 1], stride=[1, 2, 1, 2], padding=[0, 1, 0]),
            ResNet50BasicBlock(512, outs=[128, 128, 512], kernerl_size=[1, 3, 1], stride=[1, 1, 1, 1], padding=[0, 1, 0]),
            ResNet50BasicBlock(512, outs=[128, 128, 512], kernerl_size=[1, 3, 1], stride=[1, 1, 1, 1], padding=[0, 1, 0]),
            ResNet50DownBlock(512, outs=[128, 128, 512], kernel_size=[1, 3, 1], stride=[1, 1, 1, 1], padding=[0, 1, 0])
        )

        self.layer3 = nn.Sequential(
            ResNet50DownBlock(512, outs=[256, 256, 1024], kernel_size=[1, 3, 1], stride=[1, 2, 1, 2], padding=[0, 1, 0]),
            ResNet50BasicBlock(1024, outs=[256, 256, 1024], kernerl_size=[1, 3, 1], stride=[1, 1, 1, 1],
                               padding=[0, 1, 0]),
            ResNet50BasicBlock(1024, outs=[256, 256, 1024], kernerl_size=[1, 3, 1], stride=[1, 1, 1, 1],
                               padding=[0, 1, 0]),
            ResNet50DownBlock(1024, outs=[256, 256, 1024], kernel_size=[1, 3, 1], stride=[1, 1, 1, 1],
                              padding=[0, 1, 0]),
            ResNet50DownBlock(1024, outs=[256, 256, 1024], kernel_size=[1, 3, 1], stride=[1, 1, 1, 1],
                              padding=[0, 1, 0]),
            ResNet50DownBlock(1024, outs=[256, 256, 1024], kernel_size=[1, 3, 1], stride=[1, 1, 1, 1],
                              padding=[0, 1, 0])
        )

        self.layer4 = nn.Sequential(
            ResNet50DownBlock(1024, outs=[512, 512, 2048], kernel_size=[1, 3, 1], stride=[1, 2, 1, 2],
                              padding=[0, 1, 0]),
            ResNet50DownBlock(2048, outs=[512, 512, 2048], kernel_size=[1, 3, 1], stride=[1, 1, 1, 1],
                              padding=[0, 1, 0]),
            ResNet50DownBlock(2048, outs=[512, 512, 2048], kernel_size=[1, 3, 1], stride=[1, 1, 1, 1],
                              padding=[0, 1, 0])
        )

        self.avgpool = nn.AdaptiveAvgPool2d(output_size=(1, 1))

        #self.fc10 = nn.Linear(2048, 10)
        #self.fc2 = nn.Linear(2048, 2)

        #self.is_embedding = is_embedding
        self.category_num = category_num

        self.fc_output = nn.Linear(2048, self.category_num)

    def forward(self, x):
        out = self.conv1(x)
        out = self.maxpool(out)
        out = self.layer1(out)
        out = self.layer2(out)
        out = self.layer3(out)
        out = self.layer4(out)
        out = self.avgpool(out)
        out = out.reshape(x.shape[0], -1)
        feature = out
        out = self.fc_output(out)
        #out10 = self.fc10(out)
        #out2 = self.fc2(out)

        return feature, out
        '''
        if self.is_embedding:
            return feature # 2048dim feature
        else:
            return out # dim = self.category_num
        '''
