# Supplementary material
Source: ML conference proceedings conference paper supplement (https://openaccess.thecvf.com/content/CVPR2023/html/Kang_Superclass_Learning_With_CVPR_2023_paper.html)
Supplement: Supplementary file 3 [file Kang_Superclass_Learning_With_CVPR_2023_supplemental.zip › Supplementary Material/Code/ptgenerate/CIFAR100-4.csv]

classes	CIFAR100	CIFAR100-4
apple	0	2
aquarium_fish	1	1
baby	2	0
bear	3	0
beaver	4	0
bed	5	3
bee	6	1
beetle	7	1
bicycle	8	3
bottle	9	3
bowl	10	3
boy	11	0
bridge	12	3
bus	13	3
butterfly	14	1
camel	15	0
can	16	3
castle	17	3
caterpillar	18	1
cattle	19	0
chair	20	3
chimpanzee	21	0
clock	22	3
cloud	23	2
cockroach	24	1
couch	25	3
crab	26	1
crocodile	27	1
cup	28	3
dinosaur	29	1
dolphin	30	0
elephant	31	0
flatfish	32	1
forest	33	2
fox	34	0
girl	35	0
hamster	36	0
house	37	3
kangaroo	38	0
keyboard	39	3
lamp	40	3
lawn_mower	41	3
leopard	42	0
lion	43	0
lizard	44	1
lobster	45	1
man	46	0
maple_tree	47	2
motorcycle	48	3
mountain	49	2
mouse	50	0
mushroom	51	2
oak_tree	52	2
orange	53	2
orchid	54	2
otter	55	0
palm_tree	56	2
pear	57	2
pickup_truck	58	3
pine_tree	59	2
plain	60	2
plate	61	3
poppy	62	2
porcupine	63	0
possum	64	0
rabbit	65	0
raccoon	66	0
ray	67	1
road	68	3
rocket	69	3
rose	70	2
sea	71	2
seal	72	0
shark	73	1
shrew	74	0
skunk	75	0
skyscraper	76	3
snail	77	1
snake	78	1
spider	79	1
squirrel	80	0
streetcar	81	3
sunflower	82	2
sweet_pepper	83	2
table	84	3
tank	85	3
telephone	86	3
television	87	3
tiger	88	0
tractor	89	3
train	90	3
trout	91	1
tulip	92	2
turtle	93	1
wardrobe	94	3
whale	95	0
willow_tree	96	2
wolf	97	0
woman	98	0
worm	99	1
