# Supplementary material
Source: ML conference proceedings conference paper supplement (https://openaccess.thecvf.com/content/CVPR2023/html/Kang_Superclass_Learning_With_CVPR_2023_paper.html)
Supplement: Supplementary file 3 [file Kang_Superclass_Learning_With_CVPR_2023_supplemental.zip › Supplementary Material/Code/README.md]

# Superclass Learning with Representation Enhancement
We provide a training example of SCLRE. You can generate the reorganized CIFAR100-4 dataset and train it. After training, you can check the result with the help of tensorboard. Some main package versions used in the program:
```
python: 3.8.12
pytorch: 1.11.0
torchvision: 0.12.0
CUDA Version: 11.4
tensorboard-logger: 0.1.0
tensorboard: 2.7.0
tqdm: 4.62.3
```
## Step1 Generate Superclass Dataset
In filefolder `ptgenerate/`, we provide a mapping list `CIFAR100-4.csv` to map common classes to superclasses according to the rules in the supplementary metarial. You can run the following command:
```
python cifar100.py
```
to get two reorganized data tensors `train.pt` and `test.pt` generated. They are placed at `./data/re_cifar100/4_categories/`.
## Step2 Train with SCLRE
After generation, in the main directory, run
```
python main.py
```
to train with SCLRE. The settings of GPUs are in `main.py`, and you can change it based on your hardware.
The training process will be shown in the terminal with the help of `tqdm`.
## Step3 Check the Result
After training, the result will be recorded with the help of `tensorboard`. By default, it will be restored in `./runs/`, and you can run
```
tensorboard --logdir=runs/
```
to check the training result. We evaluate our model in accuracy, recall, precision and F1 score. We also record the loss in the training process.
## Step4 Change the Hyperparameters
All the hyperparameters are listed in `hyperparameter.py`, and the meanings of them are also listed in the comments in this file. You can change the hyperparameters and re-train with Step2. 

To change the architecture of the model, set `attention=False` to drop CIA, set `contrastive=False` to drop contrastive adjustment loss, set `TARGET=False` to drop targeted adjustment loss.

Note that when the backbone is set as a CNN smaller than ResNet50, some network params in `model/TC2.py` need to be reset because these backbones generate representations with smaller dimensions. So we recommend to set this hyperparameter only as `ResNet50`, `ResNet101` and `ResNet152`.
